# Supplementary material for: Selection for tameness modulates the expression of heme related genes in silver foxes
Source: PubMed Central journal article supplement (PMC1858698; doi:10.1186/1744-9081-3-18), 2007-04-17
Supplement: 1744-9081-3-18-S1.pdf [file 1744-9081-3-18-S1.pdf]

## Supplementary material

### Primer sequences

HBA Fwd 5' TGACCTCCAAGTACCGTTAAGCT  
HBA Rev 5' CTCAGACTTTATTCCAACATCAGGAA  
HBB Fwd 5' CTCACCACTTTGGCAAAGAATTC  
HBB Rev 5' ACCAGCCACCACCTTCTGAT  
HBE Fwd 5' GACACCTTTGCTGAGCTAAGTGAA  
HBE Rev 5' CATGTTGCCTAGAAGCTTGAAGTTC  
HBZ Fwd 5' GGACCATCATCCTGTCCATGT  
HBZ Rev 5' AGGGCCTCGGTGCCAAT  
HEBP1 Fwd 5' AGTCCCTATTTCTTTGCTGTGTT  
HEBP1 Rev 5' TGAATCCGGAACCAGACTT

**Table S1.** Foxes used for real-time RT-PCR.

| ID      | Age <sup>1</sup> | Sex <sup>2</sup> | Origin <sup>3</sup> |
|---------|------------------|------------------|---------------------|
| V227/04 | 2                | M                | wild                |
| V230/04 | 2                | M                | wild                |
| V231/04 | 2                | M                | wild                |
| V247/04 | 1                | M                | wild                |
| V296/04 | 1                | M                | wild                |
| V297/04 | 1.5              | F                | wild                |
| V299/04 | 3                | F                | wild                |
| V301/04 | 1                | M                | wild                |
| V302/04 | 6                | F                | wild                |
| V226/04 | 3                | M                | wild                |
| V232/04 | 4                | M                | wild                |
| V300/04 | 6                | M                | wild                |
| 300022  | 4                | F                | S                   |
| 302034  | 2                | F                | S                   |
| 303120  | 1                | M                | S                   |
| 303121  | 1                | M                | S                   |
| 303122  | 1                | M                | S                   |
| 396517  | 8                | M                | S                   |
| 303100  | 1                | M                | S                   |
| 303101  | 1                | F                | S                   |
| 303104  | 1                | F                | S                   |
| 001004  | 3                | F                | NS                  |
| 003017  | 1                | M                | NS                  |
| 003021  | 1                | F                | NS                  |
| 003023  | 1                | M                | NS                  |
| 003024  | 1                | M                | NS                  |
| 003029  | 1                | M                | NS                  |
| 003033  | 1                | F                | NS                  |
| 003087  | 1                | F                | NS                  |
| 003088  | 1                | M                | NS                  |
| 003025  | 1                | M                | NS                  |
| 003027  | 1                | M                | NS                  |

|        |   |   |    |
|--------|---|---|----|
| 003091 | 1 | M | NS |
| 003092 | 1 | F | NS |
| 003028 | 1 | F | NS |
| 003078 | 1 | F | NS |
| 003079 | 1 | F | NS |
| 003093 | 1 | F | NS |
| 303105 | 1 | M | F1 |
| 303107 | 1 | M | F1 |
| 303108 | 1 | M | F1 |
| 303110 | 1 | M | F1 |
| 303109 | 7 | M | F1 |
| 399066 | 5 | F | F1 |
| 003063 | 1 | M | BC |
| 303034 | 1 | M | BC |
| 303035 | 1 | M | BC |
| 303036 | 1 | M | BC |
| 303038 | 1 | F | BC |
| 303039 | 1 | F | BC |

<sup>1</sup> = given in years

<sup>2</sup> = F (female), M (male)

<sup>3</sup> = wild, S (selected), NS (non-selected), F1 (cross between NS and S), BC (cross between F1 and NS).
